# Supplementary material
Source: Elsevier journal article supplement (https://comptes-rendus.academie-sciences.fr/geoscience/article/10.1016/j.crte.2017.02.005/file/attach/mmc3.pdf)
Supplement: mmc3 [file mmc3.pdf]

supplementary Table 1: Representative chemical analyses (in wt.%) of olivines of Cameroon dykes

| Sample           | Mb    | Mb    | Mb    | Mb    | Mb    | Mb    | Mb    | Mb    | Mb    | Mb    | M3    | M3    | M3    | M3    | M3    | M3    | M3    | M3    | M3    | M3    | M3    | D1a   | D1a   | D1a   | D1a   | D1a   | D1a   | D1a   | D1a   | D1a   | D1a   | D1a   | Tb    | Tb    | Tb    | Tb    | Tb   |
|------------------|-------|-------|-------|-------|-------|-------|-------|-------|-------|-------|-------|-------|-------|-------|-------|-------|-------|-------|-------|-------|-------|-------|-------|-------|-------|-------|-------|-------|-------|-------|-------|-------|-------|-------|-------|-------|------|
| Description      | core  | rim   | core  | rim   | core  | core  | rim   | core  | core  | core  | core  | rim   | core  | core  | core  | rim   | core  | rim   | core  | rim   | core  | rim   | core  | rim   | core  | core  | rim   | rim   | core  | core  | core  | rim   | core  | rim   | core  | rim   | core |
| SiO <sub>2</sub> | 40.03 | 39.86 | 39.13 | 39.99 | 40.56 | 39.58 | 39.59 | 38.19 | 38.27 | 38.99 | 40.37 | 38.13 | 39.94 | 40.13 | 39.78 | 40.27 | 38.55 | 36.69 | 39.44 | 30.96 | 39.59 | 37.28 | 39.15 | 40.14 | 36.79 | 36.42 | 38.65 | 39.68 | 37.49 | 31.59 | 39.38 | 39.85 | 40.52 | 40.18 | 38.62 |       |      |
| FeO              | 18.20 | 18.47 | 15.86 | 17.64 | 16.20 | 14.50 | 17.38 | 17.97 | 17.94 | 16.21 | 15.34 | 22.12 | 15.89 | 16.06 | 15.35 | 16.35 | 16.10 | 30.35 | 17.19 | 60.47 | 15.39 | 26.72 | 16.62 | 12.55 | 31.27 | 32.45 | 17.06 | 13.14 | 29.83 | 54.11 | 13.63 | 15.00 | 14.43 | 16.27 | 15.79 |       |      |
| MnO              | 0.20  | 0.03  | 0.33  | 0.00  | 0.47  | 0.05  | 0.44  | 0.28  | 0.28  | 0.16  | 0.09  | 0.37  | 0.41  | 0.24  | 0.42  | 0.30  | 0.18  | 0.36  | 0.03  | 1.32  | 0.33  | 0.76  | 0.47  | 0.17  | 0.88  | 0.53  | 0.28  | 0.53  | 0.55  | 0.93  | 0.35  | 0.00  | 0.17  | 0.34  | 0.22  |       |      |
| MgO              | 42.50 | 42.32 | 42.95 | 43.22 | 44.37 | 43.59 | 43.84 | 41.72 | 42.71 | 42.97 | 44.06 | 38.02 | 42.50 | 42.84 | 44.43 | 43.32 | 42.55 | 29.95 | 42.52 | 5.58  | 45.12 | 34.75 | 43.30 | 46.81 | 31.78 | 31.21 | 42.21 | 45.31 | 32.06 | 10.70 | 44.59 | 42.55 | 45.67 | 42.63 | 43.51 |       |      |
| CaO              | 0.35  | 0.22  | 0.32  | 0.33  | 0.10  | -     | 0.24  | 0.24  | 0.34  | 0.18  | 0.22  | 0.36  | 0.25  | 0.40  | 0.09  | 0.40  | 0.39  | 0.35  | 0.28  | 0.20  | 0.37  | 0.42  | 0.37  | 0.22  | 0.18  | 0.29  | 0.42  | 0.19  | 0.20  | 0.20  | 0.13  | 0.38  | 0.24  | 0.38  | 0.28  |       |      |
| NiO              | -     | 0.62  | 0.12  | 0.04  | 0.46  | -     | 0.16  | 0.41  | 0.50  | 0.27  | -     | 0.05  | -     | 0.05  | -     | -     | 0.49  | 0.23  | 0.20  | 0.39  | -     | -     | -     | 0.44  | -     | 0.11  | 0.14  | -     | -     | -     | 0.16  | -     | 0.45  | 0.31  | 0.21  |       |      |
| sum              | 101.3 | 101.5 | 98.7  | 101.2 | 102.2 | 97.7  | 101.7 | 98.8  | 100.0 | 98.8  | 100.1 | 99.1  | 99.0  | 99.7  | 100.1 | 100.6 | 98.2  | 97.9  | 99.7  | 98.9  | 100.8 | 99.9  | 99.9  | 100.3 | 100.9 | 101.0 | 98.8  | 98.9  | 100.1 | 97.5  | 98.2  | 97.8  | 101.5 | 100.1 | 98.6  |       |      |
| Fo               | 81    | 80    | 83    | 81    | 83    | 84    | 82    | 81    | 81    | 83    | 84    | 75    | 83    | 83    | 84    | 83    | 82    | 64    | 82    | 14    | 84    | 70    | 82    | 87    | 64    | 63    | 82    | 86    | 66    | 26    | 85    | 83    | 85    | 82    | 83    |       |      |
| Si               | 1.006 | 1.003 | 1.002 | 1.003 | 1.003 | 1.013 | 0.991 | 0.989 | 0.980 | 0.999 | 1.012 | 1.002 | 1.017 | 1.014 | 1.000 | 1.010 | 0.995 | 1.017 | 1.004 | 1.011 | 0.990 | 0.995 | 0.994 | 0.995 | 0.994 | 0.989 | 0.996 | 1.001 | 1.011 | 1.008 | 1.002 | 1.021 | 1.001 | 1.014 | 0.990 |       |      |
| Fe               | 0.383 | 0.389 | 0.339 | 0.370 | 0.335 | 0.310 | 0.364 | 0.389 | 0.384 | 0.347 | 0.322 | 0.486 | 0.338 | 0.340 | 0.323 | 0.343 | 0.348 | 0.704 | 0.366 | 1.652 | 0.322 | 0.597 | 0.353 | 0.260 | 0.707 | 0.737 | 0.367 | 0.277 | 0.673 | 1.444 | 0.290 | 0.322 | 0.298 | 0.343 | 0.339 |       |      |
| Mn               | 0.004 | 0.001 | 0.007 | 0.000 | 0.010 | 0.001 | 0.009 | 0.006 | 0.006 | 0.003 | 0.002 | 0.008 | 0.009 | 0.005 | 0.009 | 0.006 | 0.004 | 0.009 | 0.001 | 0.036 | 0.007 | 0.017 | 0.010 | 0.004 | 0.020 | 0.012 | 0.006 | 0.011 | 0.012 | 0.025 | 0.008 | 0.000 | 0.004 | 0.007 | 0.005 |       |      |
| Mg               | 1.592 | 1.587 | 1.639 | 1.615 | 1.636 | 1.663 | 1.636 | 1.611 | 1.630 | 1.641 | 1.647 | 1.490 | 1.613 | 1.615 | 1.665 | 1.620 | 1.637 | 1.238 | 1.614 | 0.272 | 1.682 | 1.383 | 1.639 | 1.731 | 1.280 | 1.263 | 1.621 | 1.704 | 1.288 | 0.509 | 1.691 | 1.626 | 1.682 | 1.604 | 1.664 |       |      |
| Ca               | 0.009 | 0.006 | 0.009 | 0.009 | 0.003 | 0.000 | 0.006 | 0.007 | 0.009 | 0.005 | 0.006 | 0.010 | 0.007 | 0.011 | 0.002 | 0.011 | 0.011 | 0.010 | 0.008 | 0.007 | 0.010 | 0.012 | 0.010 | 0.006 | 0.005 | 0.009 | 0.012 | 0.005 | 0.006 | 0.007 | 0.004 | 0.010 | 0.006 | 0.010 | 0.008 |       |      |
| Ni               | 0.000 | 0.012 | 0.002 | 0.001 | 0.009 | 0.000 | 0.003 | 0.009 | 0.010 | 0.005 | 0.000 | 0.001 | 0.000 | 0.001 | 0.000 | 0.000 | 0.010 | 0.005 | 0.004 | 0.010 | 0.000 | 0.000 | 0.000 | 0.009 | 0.000 | 0.002 | 0.003 | 0.000 | 0.000 | 0.000 | 0.000 | 0.003 | 0.000 | 0.009 | 0.006 | 0.004 |      |
| sum              | 2.994 | 2.985 | 2.996 | 2.997 | 2.987 | 2.987 | 3.006 | 3.002 | 3.010 | 2.996 | 2.988 | 2.997 | 2.983 | 2.985 | 3.000 | 2.990 | 2.995 | 2.978 | 2.992 | 2.979 | 3.010 | 3.005 | 3.006 | 2.996 | 3.006 | 3.009 | 3.002 | 2.999 | 2.989 | 2.992 | 2.995 | 2.979 | 2.990 | 2.979 | 3.005 |       |      |
